# Supplementary material for: 2.5 Million Person-Years of Life Have Been Lost Due to COVID-19 in the United States
Source: bioRxiv or medRxiv preprint supplement (doi:10.1101/2020.10.18.20214783), 2020-10-27
Supplement: Supplementary file [file media-1.pdf]

**Table 1. Actuarial Life Table for Male and Females in the US in 2017**

<https://www.ssa.gov/oact/STATS/table4c6.html#fn1>

**Period Life Table, 2017**

| Exact age | Male                  | Male                | Male            | Female                | Female              | Female          |
|-----------|-----------------------|---------------------|-----------------|-----------------------|---------------------|-----------------|
|           | Death Probability (a) | Number of Lives (b) | Life expectancy | Death Probability (a) | Number of Lives (b) | Life expectancy |
| 0         | 0.006304              | 100,000             | 75.97           | 0.005229              | 100,000             | 80.96           |
| 1         | 0.000426              | 99,370              | 75.45           | 0.000342              | 99,477              | 80.39           |
| 2         | 0.00029               | 99,327              | 74.48           | 0.000209              | 99,443              | 79.42           |
| 3         | 0.000229              | 99,298              | 73.5            | 0.000162              | 99,422              | 78.43           |
| 4         | 0.000162              | 99,276              | 72.52           | 0.000143              | 99,406              | 77.45           |
| 5         | 0.000146              | 99,260              | 71.53           | 0.000125              | 99,392              | 76.46           |
| 6         | 0.000136              | 99,245              | 70.54           | 0.000113              | 99,379              | 75.47           |
| 7         | 0.000127              | 99,232              | 69.55           | 0.000104              | 99,368              | 74.47           |
| 8         | 0.000115              | 99,219              | 68.56           | 0.000097              | 99,358              | 73.48           |
| 9         | 0.000103              | 99,208              | 67.57           | 0.000093              | 99,348              | 72.49           |
| 10        | 0.000097              | 99,197              | 66.57           | 0.000092              | 99,339              | 71.5            |
| 11        | 0.000109              | 99,188              | 65.58           | 0.000098              | 99,330              | 70.5            |
| 12        | 0.000151              | 99,177              | 64.59           | 0.000113              | 99,320              | 69.51           |
| 13        | 0.000232              | 99,162              | 63.6            | 0.000138              | 99,309              | 68.52           |
| 14        | 0.000343              | 99,139              | 62.61           | 0.000172              | 99,295              | 67.53           |
| 15        | 0.000465              | 99,105              | 61.63           | 0.000211              | 99,278              | 66.54           |
| 16        | 0.000588              | 99,059              | 60.66           | 0.000251              | 99,257              | 65.55           |
| 17        | 0.00072               | 99,001              | 59.7            | 0.000293              | 99,232              | 64.57           |
| 18        | 0.000858              | 98,929              | 58.74           | 0.000336              | 99,203              | 63.59           |
| 19        | 0.000999              | 98,845              | 57.79           | 0.000379              | 99,170              | 62.61           |
| 20        | 0.001146              | 98,746              | 56.85           | 0.000425              | 99,132              | 61.63           |
| 21        | 0.001288              | 98,633              | 55.91           | 0.000472              | 99,090              | 60.66           |
| 22        | 0.001407              | 98,506              | 54.98           | 0.000515              | 99,044              | 59.69           |
| 23        | 0.001494              | 98,367              | 54.06           | 0.000551              | 98,993              | 58.72           |
| 24        | 0.001556              | 98,220              | 53.14           | 0.000582              | 98,938              | 57.75           |
| 25        | 0.00161               | 98,067              | 52.22           | 0.000612              | 98,880              | 56.78           |
| 26        | 0.001665              | 97,910              | 51.31           | 0.000646              | 98,820              | 55.82           |
| 27        | 0.001717              | 97,746              | 50.39           | 0.000684              | 98,756              | 54.85           |
| 28        | 0.001767              | 97,579              | 49.48           | 0.000729              | 98,689              | 53.89           |
| 29        | 0.001817              | 97,406              | 48.56           | 0.000779              | 98,617              | 52.93           |
| 30        | 0.001865              | 97,229              | 47.65           | 0.000833              | 98,540              | 51.97           |
| 31        | 0.001911              | 97,048              | 46.74           | 0.000887              | 98,458              | 51.01           |
| 32        | 0.00196               | 96,862              | 45.83           | 0.000939              | 98,370              | 50.06           |

|    |          |        |       |          |        |       |
|----|----------|--------|-------|----------|--------|-------|
| 33 | 0.002014 | 96,672 | 44.92 | 0.000988 | 98,278 | 49.1  |
| 34 | 0.002071 | 96,478 | 44.01 | 0.001034 | 98,181 | 48.15 |
| 35 | 0.002138 | 96,278 | 43.1  | 0.001085 | 98,079 | 47.2  |
| 36 | 0.002211 | 96,072 | 42.19 | 0.001143 | 97,973 | 46.25 |
| 37 | 0.002279 | 95,860 | 41.28 | 0.001205 | 97,861 | 45.3  |
| 38 | 0.002342 | 95,641 | 40.37 | 0.001271 | 97,743 | 44.36 |
| 39 | 0.002405 | 95,417 | 39.47 | 0.001345 | 97,619 | 43.41 |
| 40 | 0.002482 | 95,188 | 38.56 | 0.001429 | 97,488 | 42.47 |
| 41 | 0.002583 | 94,951 | 37.65 | 0.001524 | 97,348 | 41.53 |
| 42 | 0.00271  | 94,706 | 36.75 | 0.00163  | 97,200 | 40.59 |
| 43 | 0.00287  | 94,450 | 35.85 | 0.001748 | 97,042 | 39.66 |
| 44 | 0.003064 | 94,178 | 34.95 | 0.001881 | 96,872 | 38.73 |
| 45 | 0.003285 | 93,890 | 34.06 | 0.002029 | 96,690 | 37.8  |
| 46 | 0.003538 | 93,581 | 33.17 | 0.002195 | 96,494 | 36.88 |
| 47 | 0.003834 | 93,250 | 32.28 | 0.002386 | 96,282 | 35.96 |
| 48 | 0.004178 | 92,893 | 31.41 | 0.002605 | 96,052 | 35.04 |
| 49 | 0.004569 | 92,505 | 30.54 | 0.002851 | 95,802 | 34.13 |
| 50 | 0.004997 | 92,082 | 29.67 | 0.003118 | 95,529 | 33.23 |
| 51 | 0.005462 | 91,622 | 28.82 | 0.003403 | 95,231 | 32.33 |
| 52 | 0.005971 | 91,122 | 27.98 | 0.003714 | 94,907 | 31.44 |
| 53 | 0.006526 | 90,577 | 27.14 | 0.004052 | 94,554 | 30.55 |
| 54 | 0.007125 | 89,986 | 26.32 | 0.004415 | 94,171 | 29.68 |
| 55 | 0.007766 | 89,345 | 25.5  | 0.004813 | 93,755 | 28.81 |
| 56 | 0.008445 | 88,651 | 24.7  | 0.005233 | 93,304 | 27.94 |
| 57 | 0.009156 | 87,903 | 23.9  | 0.005647 | 92,816 | 27.09 |
| 58 | 0.009897 | 87,098 | 23.12 | 0.006043 | 92,292 | 26.24 |
| 59 | 0.010671 | 86,236 | 22.34 | 0.006441 | 91,734 | 25.39 |
| 60 | 0.011519 | 85,316 | 21.58 | 0.006886 | 91,143 | 24.56 |
| 61 | 0.012419 | 84,333 | 20.83 | 0.007391 | 90,515 | 23.72 |
| 62 | 0.013307 | 83,286 | 20.08 | 0.007931 | 89,846 | 22.9  |
| 63 | 0.014164 | 82,177 | 19.35 | 0.008508 | 89,134 | 22.07 |
| 64 | 0.015032 | 81,013 | 18.62 | 0.009142 | 88,375 | 21.26 |
| 65 | 0.016013 | 79,795 | 17.89 | 0.009874 | 87,568 | 20.45 |
| 66 | 0.017138 | 78,518 | 17.18 | 0.010717 | 86,703 | 19.65 |
| 67 | 0.018362 | 77,172 | 16.47 | 0.01166  | 85,774 | 18.86 |
| 68 | 0.019693 | 75,755 | 15.77 | 0.012711 | 84,774 | 18.07 |
| 69 | 0.021174 | 74,263 | 15.07 | 0.013894 | 83,696 | 17.3  |
| 70 | 0.022889 | 72,691 | 14.39 | 0.015285 | 82,533 | 16.54 |
| 71 | 0.024869 | 71,027 | 13.71 | 0.016878 | 81,272 | 15.79 |
| 72 | 0.027095 | 69,261 | 13.05 | 0.018607 | 79,900 | 15.05 |

|     |          |        |       |          |        |       |
|-----|----------|--------|-------|----------|--------|-------|
| 73  | 0.029587 | 67,384 | 12.4  | 0.020466 | 78,413 | 14.32 |
| 74  | 0.032394 | 65,390 | 11.76 | 0.022522 | 76,809 | 13.61 |
| 75  | 0.035668 | 63,272 | 11.14 | 0.024929 | 75,079 | 12.92 |
| 76  | 0.039396 | 61,015 | 10.53 | 0.027729 | 73,207 | 12.23 |
| 77  | 0.043453 | 58,611 | 9.94  | 0.030855 | 71,177 | 11.57 |
| 78  | 0.047826 | 56,065 | 9.37  | 0.034321 | 68,981 | 10.92 |
| 79  | 0.052649 | 53,383 | 8.82  | 0.038211 | 66,613 | 10.29 |
| 80  | 0.058206 | 50,573 | 8.28  | 0.042771 | 64,068 | 9.68  |
| 81  | 0.064581 | 47,629 | 7.76  | 0.047992 | 61,328 | 9.09  |
| 82  | 0.071657 | 44,553 | 7.26  | 0.053678 | 58,385 | 8.52  |
| 83  | 0.079465 | 41,361 | 6.79  | 0.05981  | 55,251 | 7.98  |
| 84  | 0.088141 | 38,074 | 6.33  | 0.066584 | 51,946 | 7.45  |
| 85  | 0.097854 | 34,718 | 5.89  | 0.074258 | 48,487 | 6.95  |
| 86  | 0.108747 | 31,321 | 5.48  | 0.083053 | 44,887 | 6.47  |
| 87  | 0.120919 | 27,915 | 5.08  | 0.093123 | 41,159 | 6.01  |
| 88  | 0.134425 | 24,539 | 4.71  | 0.10454  | 37,326 | 5.57  |
| 89  | 0.149273 | 21,241 | 4.37  | 0.117305 | 33,424 | 5.16  |
| 90  | 0.165452 | 18,070 | 4.05  | 0.131392 | 29,503 | 4.78  |
| 91  | 0.182935 | 15,080 | 3.75  | 0.146753 | 25,627 | 4.43  |
| 92  | 0.201679 | 12,322 | 3.48  | 0.163331 | 21,866 | 4.11  |
| 93  | 0.221637 | 9,837  | 3.23  | 0.181064 | 18,294 | 3.81  |
| 94  | 0.242747 | 7,656  | 3.01  | 0.199886 | 14,982 | 3.55  |
| 95  | 0.263672 | 5,798  | 2.81  | 0.218908 | 11,987 | 3.31  |
| 96  | 0.284014 | 4,269  | 2.64  | 0.237815 | 9,363  | 3.09  |
| 97  | 0.303355 | 3,057  | 2.49  | 0.256265 | 7,136  | 2.9   |
| 98  | 0.321268 | 2,129  | 2.36  | 0.273894 | 5,308  | 2.73  |
| 99  | 0.337332 | 1,445  | 2.24  | 0.290328 | 3,854  | 2.58  |
| 100 | 0.354198 | 958    | 2.12  | 0.307747 | 2,735  | 2.42  |
| 101 | 0.371908 | 619    | 2.01  | 0.326212 | 1,893  | 2.28  |
| 102 | 0.390503 | 388    | 1.9   | 0.345785 | 1,276  | 2.14  |
| 103 | 0.410029 | 237    | 1.8   | 0.366532 | 835    | 2.01  |
| 104 | 0.43053  | 140    | 1.7   | 0.388524 | 529    | 1.88  |
| 105 | 0.452057 | 80     | 1.6   | 0.411835 | 323    | 1.76  |
| 106 | 0.474659 | 44     | 1.51  | 0.436546 | 190    | 1.65  |
| 107 | 0.498392 | 23     | 1.42  | 0.462738 | 107    | 1.54  |
| 108 | 0.523312 | 11     | 1.34  | 0.490503 | 58     | 1.44  |
| 109 | 0.549478 | 5      | 1.26  | 0.519933 | 29     | 1.34  |
| 110 | 0.576951 | 2      | 1.18  | 0.551129 | 14     | 1.24  |
| 111 | 0.605799 | 1      | 1.1   | 0.584196 | 6      | 1.15  |
| 112 | 0.636089 | 0      | 1.03  | 0.619248 | 3      | 1.06  |

|     |          |   |      |          |   |      |
|-----|----------|---|------|----------|---|------|
| 113 | 0.667893 | 0 | 0.96 | 0.656403 | 1 | 0.98 |
| 114 | 0.701288 | 0 | 0.9  | 0.695787 | 0 | 0.91 |
| 115 | 0.736353 | 0 | 0.84 | 0.736353 | 0 | 0.84 |
| 116 | 0.77317  | 0 | 0.78 | 0.77317  | 0 | 0.78 |
| 117 | 0.811829 | 0 | 0.72 | 0.811829 | 0 | 0.72 |
| 118 | 0.85242  | 0 | 0.66 | 0.85242  | 0 | 0.66 |
| 119 | 0.895041 | 0 | 0.61 | 0.895041 | 0 | 0.61 |

<sup>a</sup> Probability of dying within one year.

<sup>b</sup> Number of survivors out of 100,000 born alive.

Note: The period life expectancy at a given age for 2017 represents the average number of years of life remaining if a group of persons at that age were to experience the mortality rates for 2017 over the course of their remaining life.
