# Supplementary material for: 2.5 Million Person-Years of Life Have Been Lost Due to COVID-19 in the United States
Source: bioRxiv or medRxiv preprint supplement (doi:10.1101/2020.10.18.20214783), 2020-10-27
Supplement: Supplementary file [file media-2.pdf]

|    | A                                                                                                                                                                                                          | B                        | C                   | D                  | E                 | F                             | G            | H                             | I      | J                   | K                 |                   |
|----|------------------------------------------------------------------------------------------------------------------------------------------------------------------------------------------------------------|--------------------------|---------------------|--------------------|-------------------|-------------------------------|--------------|-------------------------------|--------|---------------------|-------------------|-------------------|
| 1  | <b>Table 2. COVID-19 Deaths in the US from the CDC as of OCT. 3 2020</b> <a href="https://www.cdc.gov/nchs/nvss/vsrr/covid_weekly/index.htm">https://www.cdc.gov/nchs/nvss/vsrr/covid_weekly/index.htm</a> |                          |                     |                    |                   |                               |              |                               |        |                     |                   |                   |
| 2  | <b>2A Deaths by Gender</b>                                                                                                                                                                                 |                          |                     |                    |                   |                               |              |                               |        |                     |                   |                   |
| 3  | <b>Males</b>                                                                                                                                                                                               |                          | <b>COVID Deaths</b> | <b>All deaths</b>  | <b>Population</b> |                               |              | <b>Females</b>                |        | <b>COVID Deaths</b> | <b>All deaths</b> | <b>Population</b> |
| 4  |                                                                                                                                                                                                            | All ages                 | 104,896             | 1,089,340          | 161,128,679       |                               |              | All ages                      | 89,191 | 998,082             | 166,038,755       |                   |
| 5  |                                                                                                                                                                                                            | Under 1 year             | 13                  | 6,487              | 1,968,505         |                               |              | Under 1 year                  | 7      | 5,212               | 1,847,935         |                   |
| 6  |                                                                                                                                                                                                            | 1-4 years                | 7                   | 1,305              | 8,163,697         |                               |              | 1-4 years                     | 8      | 928                 | 7,798,370         |                   |
| 7  |                                                                                                                                                                                                            | 5-14 years               | 22                  | 2,062              | 20,974,830        |                               |              | 5-14 years                    | 10     | 1,414               | 20,100,339        |                   |
| 8  |                                                                                                                                                                                                            | 15-24 years              | 223                 | 16,595             | 21,976,455        |                               |              | 15-24 years                   | 139    | 5,789               | 20,994,345        |                   |
| 9  |                                                                                                                                                                                                            | 25-34 years              | 1,003               | 32,519             | 23,210,709        |                               |              | 25-34 years                   | 510    | 13,512              | 22,487,065        |                   |
| 10 |                                                                                                                                                                                                            | 35-44 years              | 2,698               | 42,918             | 20,587,600        |                               |              | 35-44 years                   | 1,258  | 22,136              | 20,690,288        |                   |
| 11 |                                                                                                                                                                                                            | 45-54 years              | 7,063               | 75,065             | 20,541,202        |                               |              | 45-54 years                   | 3,325  | 44,368              | 21,090,497        |                   |
| 12 |                                                                                                                                                                                                            | 55-64 years              | 16,067              | 168,282            | 20,398,863        |                               |              | 55-64 years                   | 8,705  | 104,901             | 21,873,773        |                   |
| 13 |                                                                                                                                                                                                            | 65-74 years              | 25,722              | 240,467            | 14,246,085        |                               |              | 65-74 years                   | 16,143 | 173,389             | 16,246,231        |                   |
| 14 |                                                                                                                                                                                                            | 75-84 years              | 28,239              | 262,137            | 6,735,040         |                               |              | 75-84 years                   | 23,125 | 242,282             | 8,659,334         |                   |
| 15 |                                                                                                                                                                                                            | 85 years and             | 23,839              | 241,503            | 2,325,693         |                               |              | 85 years and                  | 35,961 | 384,151             | 4,218,810         |                   |
| 16 |                                                                                                                                                                                                            |                          |                     |                    |                   |                               |              |                               |        |                     |                   |                   |
| 17 | <b>2B Percent increased probability of dying relative to non-COVID-19 deaths</b>                                                                                                                           |                          |                     |                    |                   |                               |              |                               |        |                     |                   |                   |
| 18 |                                                                                                                                                                                                            |                          |                     |                    |                   |                               |              |                               |        |                     |                   |                   |
| 19 | <b>Sex</b>                                                                                                                                                                                                 | <b>Age group</b>         | <b>194,087</b>      | <b>Deaths from</b> | <b>Population</b> |                               |              |                               |        |                     |                   |                   |
| 20 | Total                                                                                                                                                                                                      |                          |                     |                    |                   | Deaths not involving COVID-19 | Increased Pr | Percent Increased probability |        |                     |                   |                   |
| 21 |                                                                                                                                                                                                            | All ages                 | 203,043             | 2,203,637          | 328,239,523       | 2,000,594                     | 0.10149136   | 10.15%                        |        |                     |                   |                   |
| 22 |                                                                                                                                                                                                            | Under 1 year             | 22                  | 12,405             | 3,783,052         | 12,383                        | 0.00177663   | 0.18%                         |        |                     |                   |                   |
| 23 |                                                                                                                                                                                                            | 1-4 years                | 15                  | 2,351              | 15,793,631        | 2,336                         | 0.00642123   | 0.64%                         |        |                     |                   |                   |
| 24 |                                                                                                                                                                                                            | 5-14 years               | 37                  | 3,690              | 40,994,163        | 3,653                         | 0.01012866   | 1.01%                         |        |                     |                   |                   |
| 25 |                                                                                                                                                                                                            | 15-24 years              | 374                 | 23,838             | 42,687,510        | 23,464                        | 0.01593931   | 1.59%                         |        |                     |                   |                   |
| 26 |                                                                                                                                                                                                            | 25-34 years              | 1,588               | 48,782             | 45,940,321        | 47,194                        | 0.03364835   | 3.36%                         |        |                     |                   |                   |
| 27 |                                                                                                                                                                                                            | 35-44 years              | 4,119               | 68,966             | 41,659,144        | 64,847                        | 0.06351874   | 6.35%                         |        |                     |                   |                   |
| 28 |                                                                                                                                                                                                            | 45-54 years              | 10,837              | 126,245            | 40,874,902        | 115,408                       | 0.09390164   | 9.39%                         |        |                     |                   |                   |
| 29 |                                                                                                                                                                                                            | 55-64 years              | 25,971              | 288,746            | 42,448,537        | 262,775                       | 0.0988336    | 9.88%                         |        |                     |                   |                   |
| 30 |                                                                                                                                                                                                            | 65-74 years              | 43,927              | 437,155            | 31,483,433        | 393,228                       | 0.11170873   | 11.17%                        |        |                     |                   |                   |
| 31 |                                                                                                                                                                                                            | 75-84 years              | 53,796              | 532,277            | 15,969,872        | 478,481                       | 0.1124308    | 11.24%                        |        |                     |                   |                   |
| 32 |                                                                                                                                                                                                            | 85 years and             | 62,357              | 659,182            | 6,604,958         | 596,825                       | 0.10448121   | 10.45%                        |        |                     |                   |                   |
| 33 |                                                                                                                                                                                                            |                          |                     |                    |                   |                               |              |                               |        |                     |                   |                   |
| 34 |                                                                                                                                                                                                            | 1 Data from Oct. 7, 2020 |                     |                    |                   |                               |              |                               |        |                     |                   |                   |
