# Supplementary material for: 2.5 Million Person-Years of Life Have Been Lost Due to COVID-19 in the United States
Source: bioRxiv or medRxiv preprint supplement (doi:10.1101/2020.10.18.20214783), 2020-10-27
Supplement: Supplementary file [file media-3.pdf]

|    | A                                                                                            | B     | C       | D       | E      | F      | G      | H      | I      | J      | K      | L     |
|----|----------------------------------------------------------------------------------------------|-------|---------|---------|--------|--------|--------|--------|--------|--------|--------|-------|
| 1  | <b>Table 3. Calculation of the average life expectancy (LE) for the indicated age groups</b> |       |         |         |        |        |        |        |        |        |        |       |
| 2  |                                                                                              |       |         |         |        |        |        |        |        |        |        |       |
| 3  | <b>Life expectancy of Males over the indicated span of age</b>                               |       |         |         |        |        |        |        |        |        |        |       |
| 4  | <b>Age Span</b>                                                                              | 0-1   | 1 to 4  | 5 to 14 | 15-24  | 25-34  | 35-44  | 45-54  | 55-64  | 65-74  | 75-84  | 85-94 |
| 5  |                                                                                              |       | 75.45   | 71.53   | 61.63  | 52.22  | 43.1   | 34.06  | 25.5   | 17.89  | 11.14  | 5.89  |
| 6  |                                                                                              |       | 74.48   | 70.54   | 60.66  | 51.31  | 42.19  | 33.17  | 24.7   | 17.18  | 10.53  | 5.48  |
| 7  |                                                                                              |       | 73.5    | 69.55   | 59.7   | 50.39  | 41.28  | 32.28  | 23.9   | 16.47  | 9.94   | 5.08  |
| 8  |                                                                                              |       | 72.52   | 68.56   | 58.74  | 49.48  | 40.37  | 31.41  | 23.12  | 15.77  | 9.37   | 4.71  |
| 9  |                                                                                              |       |         | 67.57   | 57.79  | 48.56  | 39.47  | 30.54  | 22.34  | 15.07  | 8.82   | 4.37  |
| 10 |                                                                                              |       |         | 66.57   | 56.85  | 47.65  | 38.56  | 29.67  | 21.58  | 14.39  | 8.28   | 4.05  |
| 11 |                                                                                              |       |         | 65.58   | 55.91  | 46.74  | 37.65  | 28.82  | 20.83  | 13.71  | 7.76   | 3.75  |
| 12 |                                                                                              |       |         | 64.59   | 54.98  | 45.83  | 36.75  | 27.98  | 20.08  | 13.05  | 7.26   | 3.48  |
| 13 |                                                                                              |       |         | 63.6    | 54.06  | 44.92  | 35.85  | 27.14  | 19.35  | 12.4   | 6.79   | 3.23  |
| 14 |                                                                                              |       |         | 62.61   | 53.14  | 44.01  | 34.95  | 26.32  | 18.62  | 11.76  | 6.33   | 3.01  |
| 15 | Average LE in years                                                                          | 75.97 | 73.9875 | 67.07   | 57.346 | 48.111 | 39.017 | 30.139 | 22.002 | 14.769 | 8.622  | 4.305 |
| 16 |                                                                                              |       |         |         |        |        |        |        |        |        |        |       |
| 17 |                                                                                              |       |         |         |        |        |        |        |        |        |        |       |
| 18 |                                                                                              |       |         |         |        |        |        |        |        |        |        |       |
| 19 | <b>Life expectancy of Females over the indicated span of age</b>                             |       |         |         |        |        |        |        |        |        |        |       |
| 20 | <b>Age Span</b>                                                                              | 0-1   | 1 to 4  | 5 to 14 | 15-24  | 25-34  | 35-44  | 45-54  | 55-64  | 65-74  | 75-84  | 85-94 |
| 21 |                                                                                              |       | 80.39   | 76.46   | 66.54  | 56.78  | 47.2   | 37.8   | 28.81  | 20.45  | 12.92  | 6.95  |
| 22 |                                                                                              |       | 79.42   | 75.47   | 65.55  | 55.82  | 46.25  | 36.88  | 27.94  | 19.65  | 12.23  | 6.47  |
| 23 |                                                                                              |       | 78.43   | 74.47   | 64.57  | 54.85  | 45.3   | 35.96  | 27.09  | 18.86  | 11.57  | 6.01  |
| 24 |                                                                                              |       | 77.45   | 73.48   | 63.59  | 53.89  | 44.36  | 35.04  | 26.24  | 18.07  | 10.92  | 5.57  |
| 25 |                                                                                              |       | 78.9225 | 72.49   | 62.61  | 52.93  | 43.41  | 34.13  | 25.39  | 17.3   | 10.29  | 5.16  |
| 26 |                                                                                              |       |         | 71.5    | 61.63  | 51.97  | 42.47  | 33.23  | 24.56  | 16.54  | 9.68   | 4.78  |
| 27 |                                                                                              |       |         | 70.5    | 60.66  | 51.01  | 41.53  | 32.33  | 23.72  | 15.79  | 9.09   | 4.43  |
| 28 |                                                                                              |       |         | 69.51   | 59.69  | 50.06  | 40.59  | 31.44  | 22.9   | 15.05  | 8.52   | 4.11  |
| 29 |                                                                                              |       |         | 68.52   | 58.72  | 49.1   | 39.66  | 30.55  | 22.07  | 14.32  | 7.98   | 3.81  |
| 30 |                                                                                              |       |         | 67.53   | 57.75  | 48.15  | 38.73  | 29.68  | 21.26  | 13.61  | 7.45   | 3.55  |
| 31 | Average LE in years                                                                          | 80.96 | 78.9225 | 71.993  | 62.131 | 52.456 | 42.95  | 33.704 | 24.998 | 16.964 | 10.065 | 5.084 |
