# Supplementary material for: 2.5 Million Person-Years of Life Have Been Lost Due to COVID-19 in the United States
Source: bioRxiv or medRxiv preprint supplement (doi:10.1101/2020.10.18.20214783), 2020-10-27
Supplement: Supplementary file [file media-5.pdf]

|   | A                                                                                                                                        | B       | C | D | E | F | G  | H | I     | J | K | L | M | N | O |
|---|------------------------------------------------------------------------------------------------------------------------------------------|---------|---|---|---|---|----|---|-------|---|---|---|---|---|---|
| 1 | Table 5. Calculation of base numbers and factors for calculation of deaths monometrically distributed through decades of life categories |         |   |   |   |   |    |   |       |   |   |   |   |   |   |
| 2 |                                                                                                                                          |         |   |   |   |   |    |   |       |   |   |   |   |   |   |
| 3 | Table 5A                                                                                                                                 |         |   |   |   |   |    |   |       |   |   |   |   |   |   |
| 4 |                                                                                                                                          | Females |   |   |   |   |    |   | Males |   |   |   |   |   |   |
|   |                                                                                                                                          |         |   |   |   |   |    |   |       |   |   |   |   |   |   |
|   |                                                                                                                                          |         |   |   |   |   |    |   |       |   |   |   |   |   |   |
|   |                                                                                                                                          |         |   |   |   |   |    |   |       |   |   |   |   |   |   |
|   |                                                                                                                                          |         |   |   |   |   |    |   |       |   |   |   |   |   |   |
|   |                                                                                                                                          |         |   |   |   |   |    |   |       |   |   |   |   |   |   |
|   |                                                                                                                                          |         |   |   |   |   |    |   |       |   |   |   |   |   |   |
|   |                                                                                                                                          |         |   |   |   |   |    |   |       |   |   |   |   |   |   |
|   |                                                                                                                                          |         |   |   |   |   |    |   |       |   |   |   |   |   |   |
|   |                                                                                                                                          |         |   |   |   |   |    |   |       |   |   |   |   |   |   |
|   |                                                                                                                                          |         |   |   |   |   |    |   |       |   |   |   |   |   |   |
|   |                                                                                                                                          |         |   |   |   |   |    |   |       |   |   |   |   |   |   |
|   |                                                                                                                                          |         |   |   |   |   |    |   |       |   |   |   |   |   |   |
|   |                                                                                                                                          |         |   |   |   |   |    |   |       |   |   |   |   |   |   |
|   |                                                                                                                                          |         |   |   |   |   |    |   |       |   |   |   |   |   |   |
|   |                                                                                                                                          |         |   |   |   |   |    |   |       |   |   |   |   |   |   |
|   |                                                                                                                                          |         |   |   |   |   |    |   |       |   |   |   |   |   |   |
|   |                                                                                                                                          |         |   |   |   |   |    |   |       |   |   |   |   |   |   |
|   |                                                                                                                                          |         |   |   |   |   |    |   |       |   |   |   |   |   |   |
|   |                                                                                                                                          |         |   |   |   |   |    |   |       |   |   |   |   |   |   |
|   |                                                                                                                                          |         |   |   |   |   |    |   |       |   |   |   |   |   |   |
|   |                                                                                                                                          |         |   |   |   |   |    |   |       |   |   |   |   |   |   |
|   |                                                                                                                                          |         |   |   |   |   |    |   |       |   |   |   |   |   |   |
|   |                                                                                                                                          |         |   |   |   |   |    |   |       |   |   |   |   |   |   |
|   |                                                                                                                                          |         |   |   |   |   |    |   |       |   |   |   |   |   |   |
|   |                                                                                                                                          |         |   |   |   |   |    |   |       |   |   |   |   |   |   |
|   |                                                                                                                                          |         |   |   |   |   |    |   |       |   |   |   |   |   |   |
|   |                                                                                                                                          |         |   |   |   |   |    |   |       |   |   |   |   |   |   |
|   |                                                                                                                                          |         |   |   |   |   |    |   |       |   |   |   |   |   |   |
|   |                                                                                                                                          |         |   |   |   |   |    |   |       |   |   |   |   |   |   |
|   |                                                                                                                                          |         |   |   |   |   |    |   |       |   |   |   |   |   |   |
|   |                                                                                                                                          |         |   |   |   |   |    |   |       |   |   |   |   |   |   |
|   |                                                                                                                                          |         |   |   |   |   |    |   |       |   |   |   |   |   |   |
|   |                                                                                                                                          |         |   |   |   |   |    |   |       |   |   |   |   |   |   |
|   |                                                                                                                                          |         |   |   |   |   |    |   |       |   |   |   |   |   |   |
|   |                                                                                                                                          |         |   |   |   |   |    |   |       |   |   |   |   |   |   |
|   |                                                                                                                                          |         |   |   |   |   |    |   |       |   |   |   |   |   |   |
|   |                                                                                                                                          |         |   |   |   |   |    |   |       |   |   |   |   |   |   |
|   |                                                                                                                                          |         |   |   |   |   |    |   |       |   |   |   |   |   |   |
|   |                                                                                                                                          |         |   |   |   |   |    |   |       |   |   |   |   |   |   |
|   |                                                                                                                                          |         |   |   |   |   |    |   |       |   |   |   |   |   |   |
|   |                                                                                                                                          |         |   |   |   |   |    |   |       |   |   |   |   |   |   |
|   |                                                                                                                                          |         |   |   |   |   |    |   |       |   |   |   |   |   |   |
|   |                                                                                                                                          |         |   |   |   |   |    |   |       |   |   |   |   |   |   |
|   |                                                                                                                                          |         |   |   |   |   |    |   |       |   |   |   |   |   |   |
|   |                                                                                                                                          |         |   |   |   |   |    |   |       |   |   |   |   |   |   |
|   |                                                                                                                                          |         |   |   |   |   |    |   |       |   |   |   |   |   |   |
|   |                                                                                                                                          |         |   |   |   |   |    |   |       |   |   |   |   |   |   |
|   |                                                                                                                                          |         |   |   |   |   |    |   |       |   |   |   |   |   |   |
|   |                                                                                                                                          |         |   |   |   |   |    |   |       |   |   |   |   |   |   |
|   |                                                                                                                                          |         |   |   |   |   |    |   |       |   |   |   |   |   |   |
|   |                                                                                                                                          |         |   |   |   |   |    |   |       |   |   |   |   |   |   |
|   |                                                                                                                                          |         |   |   |   |   |    |   |       |   |   |   |   |   |   |
|   |                                                                                                                                          |         |   |   |   |   |    |   |       |   |   |   |   |   |   |
|   |                                                                                                                                          |         |   |   |   |   |    |   |       |   |   |   |   |   |   |
|   |                                                                                                                                          |         |   |   |   |   |    |   |       |   |   |   |   |   |   |
|   |                                                                                                                                          |         |   |   |   |   |    |   |       |   |   |   |   |   |   |
|   |                                                                                                                                          |         |   |   |   |   |    |   |       |   |   |   |   |   |   |
|   |                                                                                                                                          |         |   |   |   |   |    |   |       |   |   |   |   |   |   |
|   |                                                                                                                                          |         |   |   |   |   |    |   |       |   |   |   |   |   |   |
|   |                                                                                                                                          |         |   |   |   |   |    |   |       |   |   |   |   |   |   |
|   |                                                                                                                                          |         |   |   |   |   |    |   |       |   |   |   |   |   |   |
|   |                                                                                                                                          |         |   |   |   |   |    |   |       |   |   |   |   |   |   |
|   |                                                                                                                                          |         |   |   |   |   |    |   |       |   |   |   |   |   |   |
|   |                                                                                                                                          |         |   |   |   |   |    |   |       |   |   |   |   |   |   |
|   |                                                                                                                                          |         |   |   |   |   |    |   |       |   |   |   |   |   |   |
|   |                                                                                                                                          |         |   |   |   |   |    |   |       |   |   |   |   |   |   |
|   |                                                                                                                                          |         |   |   |   |   |    |   |       |   |   |   |   |   |   |
|   |                                                                                                                                          |         |   |   |   |   |    |   |       |   |   |   |   |   |   |
|   |                                                                                                                                          |         |   |   |   |   |    |   |       |   |   |   |   |   |   |
|   |                                                                                                                                          |         |   |   |   |   |    |   |       |   |   |   |   |   |   |
|   |                                                                                                                                          |         |   |   |   |   |    |   |       |   |   |   |   |   |   |
|   |                                                                                                                                          |         |   |   |   |   |    |   |       |   |   |   |   |   |   |
|   |                                                                                                                                          |         |   |   |   |   |    |   |       |   |   |   |   |   |   |
|   |                                                                                                                                          |         |   |   |   |   |    |   |       |   |   |   |   |   |   |
|   |                                                                                                                                          |         |   |   |   |   |    |   |       |   |   |   |   |   |   |
|   |                                                                                                                                          |         |   |   |   |   |    |   |       |   |   |   |   |   |   |
|   |                                                                                                                                          |         |   |   |   |   |    |   |       |   |   |   |   |   |   |
|   |                                                                                                                                          |         |   |   |   |   |    |   |       |   |   |   |   |   |   |
|   |                                                                                                                                          |         |   |   |   |   | </ |   |       |   |   |   |   |   |   |

## Descriptions of the calculations

- (a) The male and female factors were calculated by measuring fold increase in average COVID-19 deaths per million from one decade to the next and taking the average fold increase for the decade spanning 35-44 to the decade spanning 75-84. The decades 15-24 and 25-34 were left out of the calculation as the total deaths were low and the fold increase became relatively

stable after those years. A second source of error derives from the assumption that the individuals in the 10-year groups are evenly distributed for deaths. In the absence of smaller grouping, it is not possible to definitively overcome this at this time.

- (b) For age groupings other than 10 years the base number was calculated by evenly dividing the total deaths by the number of years the group covered. For the 1-4 group the total deaths were divided by 4 and the factor used was 1.
- (c) For 85 and greater, the total deaths were summed and treated as if they were all in the 85-94 range and is further discussed in the text and in Table 4.

|    |                                      |              |                           |                 |                   |                           |                 |  |
|----|--------------------------------------|--------------|---------------------------|-----------------|-------------------|---------------------------|-----------------|--|
| 43 | Table 5C Base number (A) calculation |              |                           |                 |                   |                           |                 |  |
| 44 |                                      | Female       |                           |                 | Male              |                           |                 |  |
| 45 |                                      | All ages     | Total Deaths in age group | Base Number (A) | All ages          | Total Deaths in age group | Base Number (A) |  |
| 46 |                                      | Under 1 year | 7                         | 7               | Under 1 year      | 13                        | 13              |  |
| 47 |                                      | 1–4 years    | 8                         | 2               | 1–4 years         | 7                         | 1.75            |  |
| 48 |                                      | 5–14 years   | 10                        | 0.61454         | 5–14 years        | 22                        | 1.4381184       |  |
| 49 |                                      | 15–24 years  | 139                       | 8.5421055       | 15–24 years       | 223                       | 14.577291       |  |
| 50 |                                      | 25–34 years  | 510                       | 31.341538       | 25–34 years       | 1,003                     | 65.565127       |  |
| 51 |                                      | 35–44 years  | 1,258                     | 77.309127       | 35–44 years       | 2,698                     | 176.36561       |  |
| 52 |                                      | 45–54 years  | 3,325                     | 204.33454       | 45–54 years       | 7,063                     | 461.70139       |  |
| 53 |                                      | 55–64 years  | 8,705                     | 534.95704       | 55–64 years       | 16,067                    | 1050.284        |  |
| 54 |                                      | 65–74 years  | 16,143                    | 992.05186       | 65–74 years       | 25,722                    | 1681.4219       |  |
| 55 |                                      | 75–84 years  | 23,125                    | 1421.1237       | 75–84 years       | 28,239                    | 1845.9557       |  |
| 56 |                                      | 85 years and | 35,961                    | 2209.9472       | 85 years and over | 23,839                    | 1558.3321       |  |
| 57 |                                      |              |                           |                 |                   | 104896                    |                 |  |
| 58 |                                      |              |                           |                 |                   |                           |                 |  |
| 59 |                                      |              |                           |                 |                   |                           |                 |  |
