# Supplementary material for: 2.5 Million Person-Years of Life Have Been Lost Due to COVID-19 in the United States
Source: bioRxiv or medRxiv preprint supplement (doi:10.1101/2020.10.18.20214783), 2020-10-27
Supplement: Supplementary file [file media-7.pdf]

|    | A                                                                                                                                                                                                                                                                                                           | B                  | C                  | D                  | E                  | F                  | G                  | H                            | I                            | J                            |
|----|-------------------------------------------------------------------------------------------------------------------------------------------------------------------------------------------------------------------------------------------------------------------------------------------------------------|--------------------|--------------------|--------------------|--------------------|--------------------|--------------------|------------------------------|------------------------------|------------------------------|
| 1  | <b>Table 7. Population distribution in the US by sex according to the 2000 and 2010 census.</b>                                                                                                                                                                                                             |                    |                    |                    |                    |                    |                    |                              |                              |                              |
| 2  | (For information on confidentiality protection, nonsampling error, and definitions, see <a href="http://www.census.gov/prod/cen2010/doc/sf1.pdf">www.census.gov/prod/cen2010/doc/sf1.pdf</a> )                                                                                                              |                    |                    |                    |                    |                    |                    |                              |                              |                              |
| 3  | Adapted from Age and Sex Composition: 2010 Issued May 2011 2010 Census Briefs by Lindsay M. Howden and Julie A. Meyer <a href="https://www.census.gov/topics/population/age-and-sex/library/publications.2011.html">https://www.census.gov/topics/population/age-and-sex/library/publications.2011.html</a> |                    |                    |                    |                    |                    |                    |                              |                              |                              |
| 4  | <b>Population by Age and Sex: 2000 and 2010</b>                                                                                                                                                                                                                                                             |                    |                    |                    |                    |                    |                    |                              |                              |                              |
| 5  |                                                                                                                                                                                                                                                                                                             |                    |                    |                    |                    |                    |                    |                              |                              |                              |
| 6  | Census Year                                                                                                                                                                                                                                                                                                 | 2000               | 2000               | 2000               | 2010               | 2010               | 2010               | Percent change, 2000 to 2010 | Percent change, 2000 to 2010 | Percent change, 2000 to 2010 |
| 7  |                                                                                                                                                                                                                                                                                                             | Both sexes         | Male               | Female             | Both sexes         | Male               | Female             | Both sexes                   | Male                         | Female                       |
| 8  | <b>All ages</b>                                                                                                                                                                                                                                                                                             | <b>281,421,906</b> | <b>138,053,563</b> | <b>143,368,343</b> | <b>308,745,538</b> | <b>151,781,326</b> | <b>156,964,212</b> | <b>9.7</b>                   | <b>9.9</b>                   | <b>9.5</b>                   |
| 9  | Under 5 years .                                                                                                                                                                                                                                                                                             | 19,175,798         | 9,810,733          | 9,365,065          | 20,201,362         | 10,319,427         | 9,881,935          | 5.3                          | 5.2                          | 5.5                          |
| 10 | 5 to 9 years.                                                                                                                                                                                                                                                                                               | 20,549,505         | 10,523,277         | 10,026,228         | 20,348,657         | 10,389,638         | 9,959,019          | -1.0                         | -1.3                         | -0.7                         |
| 11 | 10 to 14 years.                                                                                                                                                                                                                                                                                             | 20,528,072         | 10,520,197         | 10,007,875         | 20,677,194         | 10,579,862         | 10,097,332         | 0.7                          | 0.6                          | 0.9                          |
| 12 | 15 to 19 years.                                                                                                                                                                                                                                                                                             | 20,219,890         | 10,391,004         | 9,828,886          | 22,040,343         | 11,303,666         | 10,736,677         | 9.0                          | 8.8                          | 9.2                          |
| 13 | 20 to 24 years.                                                                                                                                                                                                                                                                                             | 18,964,001         | 9,687,814          | 9,276,187          | 21,585,999         | 11,014,176         | 10,571,823         | 13.8                         | 13.7                         | 14.0                         |
| 14 | 25 to 29 years.                                                                                                                                                                                                                                                                                             | 19,381,336         | 9,798,760          | 9,582,576          | 21,101,849         | 10,635,591         | 10,466,258         | 8.9                          | 8.5                          | 9.2                          |
| 15 | 30 to 34 years.                                                                                                                                                                                                                                                                                             | 20,510,388         | 10,321,769         | 10,188,619         | 19,962,099         | 9,996,500          | 9,965,599          | 2.7                          | -3.2                         | -2.2                         |
| 16 | 35 to 39 years.                                                                                                                                                                                                                                                                                             | 22,706,664         | 11,318,696         | 11,387,968         | 20,179,642         | 10,042,022         | 10,137,620         | -11.1                        | -11.3                        | -11.0                        |
| 17 | 40 to 44 years.                                                                                                                                                                                                                                                                                             | 22,441,863         | 11,129,102         | 11,312,761         | 20,890,964         | 10,393,977         | 10,496,987         | -6.9                         | -6.6                         | -7.2                         |
| 18 | 45 to 49 years.                                                                                                                                                                                                                                                                                             | 20,092,404         | 9,889,506          | 10,202,898         | 22,708,591         | 11,209,085         | 11,499,506         | 13.0                         | 13.3                         | 12.7                         |
| 19 | 50 to 54 years.                                                                                                                                                                                                                                                                                             | 17,585,548         | 8,607,724          | 8,977,824          | 22,298,125         | 10,933,274         | 11,364,851         | 26.8                         | 27.0                         | 26.6                         |
| 20 | 55 to 59 years.                                                                                                                                                                                                                                                                                             | 13,469,237         | 6,508,729          | 6,960,508          | 19,664,805         | 9,523,648          | 10,141,157         | 46.0                         | 46.3                         | 45.7                         |
| 21 | 60 to 64 years.                                                                                                                                                                                                                                                                                             | 10,805,447         | 5,136,627          | 5,668,820          | 16,817,924         | 8,077,500          | 8,740,424          | 55.6                         | 57.3                         | 54.2                         |
| 22 | 65 to 69 years.                                                                                                                                                                                                                                                                                             | 9,533,545          | 4,400,362          | 5,133,183          | 12,435,263         | 5,852,547          | 6,582,716          | 30.4                         | 33.0                         | 28.2                         |
| 23 | 70 to 74 years.                                                                                                                                                                                                                                                                                             | 8,857,441          | 3,902,912          | 4,954,529          | 9,278,166          | 4,243,972          | 5,034,194          | 4.7                          | 8.7                          | 1.6                          |
| 24 | 75 to 79 years.                                                                                                                                                                                                                                                                                             | 7,415,813          | 3,044,456          | 4,371,357          | 7,317,795          | 3,182,388          | 4,135,407          | -1.3                         | 4.5                          | -5.4                         |
| 25 | 80 to 84 years.                                                                                                                                                                                                                                                                                             | 4,945,367          | 1,834,897          | 3,110,470          | 5,743,327          | 2,294,374          | 3,448,953          | 16.1                         | 25.0                         | 10.9                         |
| 26 | 85 to 89 years.                                                                                                                                                                                                                                                                                             | 2,789,818          | 876,501            | 1,913,317          | 3,620,459          | 1,273,867          | 2,346,592          | 29.8                         | 45.3                         | 22.6                         |
| 27 | 90 to 94 years.                                                                                                                                                                                                                                                                                             | 1,112,531          | 282,325            | 830,206            | 1,448,366          | 424,387            | 1,023,979          | 30.2                         | 50.3                         | 23.3                         |
| 28 | 95 to 99 years.                                                                                                                                                                                                                                                                                             | 286,784            | 58,115             | 228,669            | 371,244            | 82,263             | 288,981            | 29.5                         | 41.6                         | 26.4                         |
| 29 | 100 years and over .                                                                                                                                                                                                                                                                                        | 50,454             | 10,057             | 40,397             | 53,364             | 9,162              | 44,202             | 5.8                          | -8.9                         | 9.4                          |
| 30 | Median age.                                                                                                                                                                                                                                                                                                 | 35.3               | 34.0               | 36.5               | 37.2               | 35.8               | 38.5               | (X)                          | (X)                          | (X)                          |
