# Supplementary material for: 2.5 Million Person-Years of Life Have Been Lost Due to COVID-19 in the United States
Source: bioRxiv or medRxiv preprint supplement (doi:10.1101/2020.10.18.20214783), 2020-10-27
Supplement: Supplementary file [file media-8.pdf]

|    | A                                                                                       | B                            | C                         | D                         | E                         | F                                   | G                                     | H                                             | I                                      | J                          | K               | L            |
|----|-----------------------------------------------------------------------------------------|------------------------------|---------------------------|---------------------------|---------------------------|-------------------------------------|---------------------------------------|-----------------------------------------------|----------------------------------------|----------------------------|-----------------|--------------|
| 1  | <b>Table 8. Distribution of COVID-19 associated deaths among different ethnicities.</b> |                              |                           |                           |                           |                                     |                                       |                                               |                                        |                            |                 |              |
| 2  |                                                                                         |                              |                           |                           |                           |                                     |                                       |                                               |                                        |                            |                 |              |
| 3  | <b>Age group</b>                                                                        | <b>Total COVID-19 Deaths</b> | <b>Non-Hispanic White</b> | <b>Non-Hispanic Black</b> | <b>Hispanic or Latino</b> | <b>Non-Hispanic American Indian</b> | <b>Non-Hispanic Asian<sup>3</sup></b> | <b>Non-Hispanic Native Hawai</b>              | <b>Non-Hispanic More than One Race</b> | <b>Unknown<sup>4</sup></b> |                 |              |
| 4  | All Ages                                                                                | 198,809                      | 102,250                   | 41,066                    | 42,295                    | 1,987                               | 8,188                                 | 341                                           |                                        | 561                        | 2,121           |              |
| 5  | Under 1 year                                                                            | 22                           | 5                         | 5                         | 9                         | 0                                   | 1                                     | 1                                             |                                        | 0                          | 1               |              |
| 6  | 1–4 years                                                                               | 15                           | 5                         | 3                         | 5                         | 1                                   | 0                                     | 0                                             |                                        | 1                          | 0               |              |
| 7  | 5–14 years                                                                              | 35                           | 7                         | 10                        | 15                        | 1                                   | 2                                     | 0                                             |                                        | 0                          | 0               |              |
| 8  | 15–24 years                                                                             | 369                          | 60                        | 116                       | 163                       | 9                                   | 10                                    | 4                                             |                                        | 4                          | 3               |              |
| 9  | 25–34 years                                                                             | 1,541                        | 253                       | 441                       | 668                       | 82                                  | 58                                    | 19                                            |                                        | 9                          | 11              |              |
| 10 | 35–44 years                                                                             | 4,039                        | 589                       | 1,113                     | 2,007                     | 115                                 | 142                                   | 25                                            |                                        | 16                         | 32              |              |
| 11 | 45–54 years                                                                             | 10,627                       | 2,217                     | 2,889                     | 4,638                     | 245                                 | 431                                   | 53                                            |                                        | 38                         | 116             |              |
| 12 | 55–64 years                                                                             | 25,421                       | 7,974                     | 7,141                     | 8,267                     | 420                                 | 1,097                                 | 90                                            |                                        | 90                         | 342             |              |
| 13 | 65–74 years                                                                             | 42,950                       | 18,508                    | 10,999                    | 10,229                    | 492                                 | 1,927                                 | 86                                            |                                        | 132                        | 577             |              |
| 14 | 75–84 years                                                                             | 52,618                       | 29,781                    | 10,402                    | 9,196                     | 386                                 | 2,076                                 | 42                                            |                                        | 145                        | 590             |              |
| 15 | 85 years and                                                                            | 61,172                       | 42,851                    | 7,947                     | 7,098                     | 236                                 | 2,444                                 | 21                                            |                                        | 126                        | 449             |              |
| 16 |                                                                                         |                              |                           |                           |                           |                                     |                                       |                                               |                                        |                            |                 |              |
| 17 |                                                                                         |                              |                           |                           |                           |                                     |                                       |                                               |                                        |                            |                 |              |
| 18 |                                                                                         |                              |                           |                           |                           |                                     |                                       |                                               |                                        |                            |                 |              |
| 19 | <b>Age group</b>                                                                        | <b>Total COVID-19 Deaths</b> | <b>White Non-Hispanic</b> | <b>Black Non-Hispanic</b> | <b>African American</b>   | <b>Hispanic or Latino</b>           | <b>Sum of others</b>                  | <b>Distribution of deaths among races (%)</b> |                                        |                            |                 |              |
| 20 | All Ages                                                                                | 198,809                      | 102,250                   | 41,066                    |                           | 42,295                              | 13,198                                | <b>White Nonhispanic</b>                      |                                        | <b>Black</b>               | <b>Hispanic</b> | <b>Other</b> |
| 21 | Under 1 year                                                                            | 22                           | 5                         | 5                         |                           | 9                                   | 3                                     | 51.43%                                        |                                        | 20.07%                     | 21.27%          | 6.64%        |
| 22 | 1–4 years                                                                               | 15                           | 5                         | 3                         |                           | 5                                   | 2                                     |                                               |                                        |                            |                 |              |
| 23 | 5–14 years                                                                              | 35                           | 7                         | 10                        |                           | 15                                  | 3                                     |                                               |                                        |                            |                 |              |
| 24 | 15–24 years                                                                             | 369                          | 60                        | 116                       |                           | 163                                 | 30                                    |                                               |                                        |                            |                 |              |
| 25 | 25–34 years                                                                             | 1,541                        | 253                       | 441                       |                           | 668                                 | 179                                   |                                               |                                        |                            |                 |              |
| 26 | 35–44 years                                                                             | 4,039                        | 589                       | 1,113                     |                           | 2,007                               | 330                                   |                                               |                                        |                            |                 |              |
| 27 | 45–54 years                                                                             | 10,627                       | 2,217                     | 2,889                     |                           | 4,638                               | 883                                   |                                               |                                        |                            |                 |              |
| 28 | 55–64 years                                                                             | 25,421                       | 7,974                     | 7,141                     |                           | 8,267                               | 2,039                                 |                                               |                                        |                            |                 |              |
| 29 | 65–74 years                                                                             | 42,950                       | 18,508                    | 10,999                    |                           | 10,229                              | 3,214                                 |                                               |                                        |                            |                 |              |
| 30 | 75–84 years                                                                             | 52,618                       | 29,781                    | 10,402                    |                           | 9,196                               | 3,239                                 |                                               |                                        |                            |                 |              |
| 31 | 85 years and                                                                            | 61,172                       | 42,851                    | 7,947                     |                           | 7,098                               | 3,276                                 |                                               |                                        |                            |                 |              |
